# Supplementary material
Source: publisher site journal article supplement (https://www.degruyterbrill.com/publication/isbn/9783110419696/downloadAsset/9783110419696_Inhaltsverzeichnis.pdf)
Supplement: Supplementary file 1 [file 9783110419696_Inhaltsverzeichnis.pdf]

# Inhalt

|         |                                                                                                                  |    |
|---------|------------------------------------------------------------------------------------------------------------------|----|
| 1.      | Vorwort .....                                                                                                    | 1  |
| 2.      | Interpretation und Anthropologie: Konzeptionen von Figuren und ihren Interaktionen .....                         | 8  |
| 2.1     | Echte Menschen und literarische Figuren; Charaktere und Typen .....                                              | 8  |
| 2.1.1   | Textinterpretation und die Frage nach dem Warum .....                                                            | 8  |
| 2.1.2   | Zum Begriff der Figur .....                                                                                      | 10 |
| 2.1.3   | Ein ‚technischer Blick‘ auf Figurenattribute und Figurenbeziehungen .....                                        | 12 |
| 2.1.4   | Handlungsprinzipien und Figuren, abstrakt: Das Konzept der Aktanten .....                                        | 16 |
| 2.1.5   | Handlungsprinzipien und Figuren, historisch: Transpersonale Identität, Einleiblichkeit, Merkmalsgleichheit ..... | 18 |
| 2.2     | Text und Kontext .....                                                                                           | 19 |
| 2.2.1   | Kulturelle Kontexte .....                                                                                        | 19 |
| 2.2.2   | Zur Relevanz kulturellen Wissens für die Textinterpretation .....                                                | 21 |
| 2.2.3   | Interpretation und die Hierarchie der Textebenen ..                                                              | 26 |
| 2.3     | Kulturelle Voraussetzungen des Verständnisses mittelalterlicher Literatur .....                                  | 29 |
| 2.3.1   | Mikrokosmos und Makrokosmos: Der Mensch als Zwischenwesen .....                                                  | 29 |
| 2.3.1.1 | Gelehrtes Wissen .....                                                                                           | 29 |
| 2.3.1.2 | Mensch und Engel: Höfische Lichtkörper .....                                                                     | 31 |
| 2.3.1.3 | Mensch und Tier 1: Der Krieger und die animalische Gewalt .....                                                  | 32 |
| 2.3.1.4 | Mensch und Tier 2: Das Unhöfische als Nicht-Menschliches .....                                                   | 34 |
| 2.3.2   | Humoralpathologie und Temperamentenlehre .....                                                                   | 37 |
| 2.3.2.1 | Gelehrtes Wissen .....                                                                                           | 37 |
| 2.3.2.2 | Kuren gegen Wahnsinn in der höfischen Dichtung .....                                                             | 38 |
| 2.3.3   | Wahrnehmen und Erkennen .....                                                                                    | 39 |

|           |                                                                                   |    |
|-----------|-----------------------------------------------------------------------------------|----|
| 2.3.3.1   | Die gelehrte Hierarchie der Sinne .....                                           | 39 |
| 2.3.3.2   | Synästhetische Komplementärmodelle .....                                          | 40 |
| 2.3.3.3   | Wahrnehmung im sozialen Feld .....                                                | 41 |
| 2.3.4     | Feudale Identität:<br>Handlungs- und Verhaltenssemantiken .....                   | 43 |
| 2.3.4.1   | Höfische Interaktion:<br>Agon, Reziprozität und ‚Ausdruck‘ .....                  | 43 |
| 2.3.4.2   | Höfische Minne .....                                                              | 53 |
| 2.3.4.2.1 | Liebe als Kunst und ihre Paradoxien .....                                         | 53 |
| 2.3.4.2.2 | Gattungszusammenhänge .....                                                       | 55 |
| 2.3.4.2.3 | Feudale Paarbildungslogiken .....                                                 | 56 |
| 2.3.4.2.4 | Magischer Zwang .....                                                             | 58 |
| 2.3.4.2.5 | Übergänge zwischen Magie und Kognition .....                                      | 59 |
| 2.3.4.2.6 | Rekurrente Bildfelder und Interaktionsmuster .....                                | 60 |
| 2.3.4.3   | Zeichen, Repräsentation und Partizipation .....                                   | 63 |
| 2.3.4.3.1 | Ein metonymisches Verhältnis zur Welt .....                                       | 63 |
| 2.3.4.3.2 | Höfische Repräsentation .....                                                     | 65 |
| 2.3.4.4   | Rituale .....                                                                     | 66 |
| 2.3.4.4.1 | Zur ordnungssetzenden Funktion von Ritualen .....                                 | 66 |
| 2.3.4.4.2 | Literarische Thematisierung und Funktionalisierung<br>von Ritualen .....          | 67 |
| 2.3.4.5   | Gewalt .....                                                                      | 72 |
| 2.3.4.5.1 | Felder der Gewalt .....                                                           | 72 |
| 2.3.4.5.2 | Kategorien der Gewalt: lozierend, raptiv, autotelisch .....                       | 73 |
| 2.3.4.6   | Kern und Hülle, Heimlichkeit und Öffentlichkeit ..                                | 75 |
| 2.3.4.6.1 | Das Böse, die Gewalt und die Falschheit .....                                     | 75 |
| 2.3.4.6.2 | Prekäre Wahrnehmung im öffentlichen Raum .....                                    | 76 |
| 2.3.4.6.3 | Kritik und Immunisierung<br>der sozialen Wahrnehmung .....                        | 78 |
| 2.3.4.7   | Altersstufenlehre und Verhaltenssemantik .....                                    | 82 |
| 2.3.5     | Determinanten adeliger Identität:<br>Der Körper, das Selbst und die anderen ..... | 88 |
| 2.3.5.1   | Identität und Individualität .....                                                | 88 |
| 2.3.5.1.1 | Brüchige und widersprüchliche Figurationen<br>des Selbst .....                    | 88 |
| 2.3.5.1.2 | Soziale Inklusion und soziale Exklusion .....                                     | 91 |
| 2.3.5.1.3 | Körper, Kleidung und Identität .....                                              | 92 |
| 2.3.5.1.4 | Individualitätsgeneratoren: Religion und Minne ...                                | 95 |
| 2.3.5.2   | Genealogie .....                                                                  | 97 |
| 2.3.5.2.1 | Sippenkörper und Adelskörper .....                                                | 97 |

|           |                                                                                                                                    |     |
|-----------|------------------------------------------------------------------------------------------------------------------------------------|-----|
| 2.3.5.2.2 | Gelehrte und feudale Vorstellungen<br>über menschliche Fortpflanzung .....                                                         | 98  |
| 2.3.5.2.3 | Genealogie als Ordnung des Wissens .....                                                                                           | 103 |
| 2.3.5.3   | Männer und Frauen:<br>Zur Kategorie des Geschlechts .....                                                                          | 104 |
| 2.3.5.3.1 | <i>Sex</i> und <i>gender</i> .....                                                                                                 | 104 |
| 2.3.5.3.2 | <i>One sex theory: natura</i> vs. <i>nutritura</i> .....                                                                           | 105 |
| 2.3.5.3.3 | Gattung und Geschlecht .....                                                                                                       | 109 |
| 2.3.5.4   | Freundschaft unter Merkmalsgleichen .....                                                                                          | 110 |
| 2.3.5.5   | Maß und Übermaß: Zur Thematisierung von<br>Affekten .....                                                                          | 112 |
| 2.3.5.5.1 | Ritual, überbordende Gefühle, ‚Hydraulik‘:<br>zum Verhältnis von Literaturwissenschaft<br>und historischer Emotionsforschung ..... | 112 |
| 2.3.5.5.2 | Zur Funktion literarischer Affektinszenierung .....                                                                                | 114 |
| 2.3.5.5.3 | Überbordende Affekte in der Literatur<br>des 13. Jahrhunderts .....                                                                | 114 |
| 2.3.6     | Anthropologie und Gattungen:<br>Höfisches und Heroisches .....                                                                     | 117 |
| 3.        | Vom mittelalterlichen Wiedererzählen: Narrative Gattungen<br>im Widerstreit konkurrierender Logiken .....                          | 119 |
| 3.1       | Gattungen im Spannungsfeld .....                                                                                                   | 119 |
| 3.1.1     | Vor-Augen-Stellen von Widersprüchlichem .....                                                                                      | 119 |
| 3.1.2     | Zum Status von Gattungen .....                                                                                                     | 120 |
| 3.2       | Literarische Elementarlogiken .....                                                                                                | 122 |
| 3.2.1     | Stoffe, Motive, Themen .....                                                                                                       | 122 |
| 3.2.2     | Wiedererzählen .....                                                                                                               | 123 |
| 3.3       | Narrativer Agon .....                                                                                                              | 124 |
| 3.3.1     | Erzählen mit der und gegen die Tradition .....                                                                                     | 124 |
| 3.3.2     | Das Prinzip der Aventiure .....                                                                                                    | 127 |
| 3.4       | Konkurrierende Logiken in den Hauptgattungen<br>des volkssprachigen Erzählens .....                                                | 128 |
| 3.4.1     | Konkurrierende Logiken 1:<br>Das Motiv des Frauenerwerbs durch Aventiure –<br>Minne und Herrschaft im höfischen Roman .....        | 128 |
| 3.4.1.1   | Heldenkonzept und Wegstruktur .....                                                                                                | 128 |
| 3.4.1.2   | Agonalität im höfischen Roman .....                                                                                                | 129 |
| 3.4.1.3   | Frauenerwerb durch Aventiure .....                                                                                                 | 130 |
| 3.4.1.4   | Der <i>chevalier errant</i> als Problem .....                                                                                      | 132 |

|         |                                                                                                                           |     |
|---------|---------------------------------------------------------------------------------------------------------------------------|-----|
| 3.4.2   | Konkurrierende Logiken 2: Märendichtung –<br>agonale Überlistung, Anspruch und Gnade . . . . .                            | 134 |
| 3.4.2.1 | Die Konkurrenz von Narration und Weisheitslehre . . . . .                                                                 | 134 |
| 3.4.2.2 | Das Schwankschema als agonales Prinzip . . . . .                                                                          | 136 |
| 3.4.3   | Konkurrierende Logiken 3: Höfische Legenden –<br>Weltflucht vs. höfische Sichtbarkeit . . . . .                           | 143 |
| 3.4.3.1 | Funktionen und Merkmale einer populären Gattung . . . . .                                                                 | 143 |
| 3.4.3.2 | Das Heilige:<br>Nicht-Verfügbarkeit vs. Zwang zur Evidenz . . . . .                                                       | 146 |
| 3.4.4   | Konkurrierende Logiken 4: Heldenepik – Höfisches<br>und Heroisches . . . . .                                              | 150 |
| 3.4.4.1 | Von alternativer Geschichtserinnerung hin zur<br>Faszination an grotesk-archaischer Gewalt . . . . .                      | 150 |
| 3.4.4.2 | Heroische vs. höfische Anthropologie . . . . .                                                                            | 152 |
| 3.4.4.3 | Gängige Schemata, Motive und Figurenentwürfe . . . . .                                                                    | 153 |
| 4.      | Erzählen nach Mustern:<br>Die gängigsten mittelalterlichen Erzählschemata . . . . .                                       | 159 |
| 4.1     | Erzählen: Das ‚Narrative‘ . . . . .                                                                                       | 159 |
| 4.1.1   | Zwei Grundbegriffe: <i>histoire</i> und <i>discours</i> . . . . .                                                         | 159 |
| 4.1.2   | Diegese bzw. dargestellte Welt . . . . .                                                                                  | 161 |
| 4.1.3   | Lineare vs. zyklische Zeitstrukturen:<br>Christlich-gelehrte Vorstellungen und<br>literarische Insel-Phantasmen . . . . . | 162 |
| 4.1.4   | Erzählen und Handlung: Ein Plädoyer . . . . .                                                                             | 164 |
| 4.1.5   | Handlung und Ereignis:<br>Die Modelle von BRÉMOND, GREIMAS und LOTMAN . . . . .                                           | 166 |
| 4.1.5.1 | Allgemeines . . . . .                                                                                                     | 166 |
| 4.1.5.2 | BRÉMOND: Regelkreis und Entscheidungsbaum . . . . .                                                                       | 167 |
| 4.1.5.3 | GREIMAS: Narrativer Dreischritt und Wertetransfer . . . . .                                                               | 171 |
| 4.1.5.4 | LOTMAN: Grenzüberschreitungen<br>zwischen semantischen Räumen . . . . .                                                   | 176 |
| 4.1.6   | Zur Theorie und zum interpretatorischen Nutzen<br>von Erzählschemata . . . . .                                            | 184 |
| 4.2     | Zentrale Muster mittelalterlichen Erzählens . . . . .                                                                     | 191 |
| 4.2.1   | Zum Brautwerbungsschema . . . . .                                                                                         | 191 |
| 4.2.1.1 | Vielseitige Verwendbarkeit: ‚Spielmannsdichtung‘,<br>Heldenepik, höfischer Roman . . . . .                                | 191 |
| 4.2.1.2 | Das Sujet des Brautwerbungsschemas . . . . .                                                                              | 193 |

|          |                                                                                               |     |
|----------|-----------------------------------------------------------------------------------------------|-----|
| 4.2.1.3  | Idealtypische Semantik und paradigmatische Strukturen . . . . .                               | 193 |
| 4.2.1.4  | Syntagma bzw. Ablaufplan . . . . .                                                            | 195 |
| 4.2.1.5  | Umbesetzung und Variation<br>des Brautwerbungsschemas 1: Das ‚Nibelungenlied‘ . .             | 204 |
| 4.2.1.6  | Umbesetzung und Variation<br>des Brautwerbungsschemas 2: Legendarische Einflüsse              | 207 |
| 4.2.1.7  | Serielle Reduktion des Brautwerbungsschemas:<br>‚Dietrichs Flucht‘ . . . . .                  | 210 |
| 4.2.2    | Zur ‚gestörten Mahrtenehe‘ . . . . .                                                          | 214 |
| 4.2.2.1  | Faszinierende Fee vs. teuflische Dämonin . . . . .                                            | 214 |
| 4.2.2.2  | Mythische Grundlagen . . . . .                                                                | 216 |
| 4.2.2.3  | Zum Sujet der ‚gestörten Mahrtenehe‘ . . . . .                                                | 218 |
| 4.2.2.4  | Syntagma bzw. Ablaufplan . . . . .                                                            | 219 |
| 4.2.2.5  | Mythisches Schema und mythologisches Spiel:<br>Maries de France ‚Lanval‘ . . . . .            | 231 |
| 4.2.2.6  | Bewältigung der Feen-Ambivalenz:<br>Narrative Spaltungsphantasmen . . . . .                   | 235 |
| 4.2.3    | Zum Artusschema: KUHN meets PROPP . . . . .                                                   | 241 |
| 4.2.3.1  | Narrative Zweiteiligkeit, ‚Doppelweg‘<br>und ‚Symbolstruktur‘ . . . . .                       | 241 |
| 4.2.3.2  | Zum Sujet des Artusromans . . . . .                                                           | 243 |
| 4.2.3.3  | Schemakomplikation und Schemareduktion . . . . .                                              | 244 |
| 4.2.3.4  | KUHNS Modell der ‚Doppelwegstruktur‘ des ‚Erec‘ . .                                           | 245 |
| 4.2.3.5  | HAUGS Modell der Chrétienschen bzw.<br>Hartmannschen ‚Symbolstruktur‘ . . . . .               | 250 |
| 4.2.3.6  | PROPPS Zaubermärchenschema als Grundlage<br>strukturalistischer Artusroman-Analysen . . . . . | 251 |
| 4.2.3.7  | Zaubermärchen und Artusroman 1:<br>Literaturanthropologische Forschungsansätze . . . . .      | 253 |
| 4.2.3.8  | Zaubermärchen und Artusroman 2:<br>Die These NOLTING-HAUFFS . . . . .                         | 256 |
| 4.2.3.9  | Märchensemantik vs. feudale Semantik . . . . .                                                | 258 |
| 4.2.3.10 | Zaubermärchen und Artusroman 3:<br>Die These SIMONS . . . . .                                 | 259 |
| 4.2.3.11 | Versuch eines Ablaufschemas<br>des ‚klassischen‘ Artusromans . . . . .                        | 261 |
| 4.2.3.12 | Artusroman und Mythos . . . . .                                                               | 271 |
| 4.2.3.13 | Unterschiedliche Möglichkeiten<br>der Schema-Realisation . . . . .                            | 274 |

|          |                                                                             |     |
|----------|-----------------------------------------------------------------------------|-----|
| 4.2.3.14 | Schemainterferenzen: <i>her Îwein jaget in âne zuht</i> ...                 | 276 |
| 4.2.3.15 | Strukturkomplexion: Wolframs ‚Parzival‘ .....                               | 279 |
| 4.2.4    | Minne- und Aventiureromane .....                                            | 281 |
| 4.2.4.1  | Zum Sujet des ‚weltlichen‘ Minne- und<br>Aventiureromans .....              | 284 |
| 4.2.4.2  | Zum Syntagma des ‚weltlichen‘ Minne-<br>und Aventiureromans .....           | 285 |
| 5.       | Räume und Zeiten .....                                                      | 292 |
| 5.1      | Literarische Weltentwürfe .....                                             | 292 |
| 5.1.1    | Ausschnitthafte oder verallgemeinernde Darstellung                          | 292 |
| 5.1.2    | Basale Kategorien der Raumorganisation .....                                | 293 |
| 5.1.3    | Basale Kategorien der Zeitorganisation .....                                | 294 |
| 5.2      | Literatur- und kulturwissenschaftliche Beschreibungsmodelle                 | 295 |
| 5.2.1    | BACHTINS ‚Chronotopos‘-Konzept .....                                        | 295 |
| 5.2.2    | LUGOWSKIS ‚mythisches Analogon‘ .....                                       | 296 |
| 5.2.3    | Providenz und Kontingenz<br>im mittelalterlichen Weltbild .....             | 297 |
| 5.2.4    | Aggregaträume und Systemräume .....                                         | 300 |
| 5.2.5    | Bewegungsräume und Schwellenräume .....                                     | 301 |
| 5.2.6    | Diskontinuierliche Räume 1:<br>Linearität und Insularität .....             | 301 |
| 5.2.7    | Diskontinuierliche Räume 2:<br>‚Falträume‘ im Innen und im Außen .....      | 304 |
| 5.2.8    | FOUCAULTS Heterotopien .....                                                | 304 |
| 5.2.9    | Mythischer vs. profaner Raum bei CASSIRER .....                             | 306 |
| 5.2.10   | Das Prinzip des Transgressiven .....                                        | 308 |
| 5.3      | Sonderräume und Unorte im höfischen Roman .....                             | 310 |
| 5.3.1    | Tristrants Waldleben:<br>Chronotopos, Heterotopie, Konkreszenz .....        | 310 |
| 5.3.2    | Mythische Unorte im Artusroman:<br>Ulrichs von Zatzikhoven ‚Lanzelet‘ ..... | 316 |
| 6.       | Verknüpfungen: Wie wird ein Text zu einem kohärenten Text?                  | 322 |
| 6.1      | Komposition, Wiederholung, Äquivalenz .....                                 | 322 |
| 6.1.1    | Narrativer Zusammenhalt .....                                               | 322 |
| 6.1.2    | Korrelative Sinnstiftung .....                                              | 323 |
| 6.1.3    | Kohärenz .....                                                              | 325 |
| 6.1.4    | Motivationsarten:<br>Unterschiedliche Formen der Klassifikation .....       | 327 |

|       |                                                                                         |     |
|-------|-----------------------------------------------------------------------------------------|-----|
| 6.1.5 | BARTHES' ‚Handlungsfolgen‘                                                              | 332 |
| 6.1.6 | Metonymisches Erzählen                                                                  | 333 |
| 6.1.7 | Erzählen im Paradigma                                                                   | 343 |
| 6.2   | Von der Funktionalität ‚blinder‘ Motive                                                 | 348 |
| 6.2.1 | Widersprüchlichkeit als Erzählprinzip                                                   | 348 |
| 6.2.2 | ‚Abgewiesene Alternativen‘                                                              | 350 |
| 6.2.3 | Prozessierung                                                                           | 359 |
| 6.2.4 | Überblendung und Hybridisierung                                                         | 362 |
| 6.2.5 | Überdetermination                                                                       | 364 |
| 7.    | Vermittler zwischen Stoff und Rezipient:                                                |     |
|       | Erzähler und Erzählperspektive                                                          | 367 |
| 7.1   | Erzähler und Perspektive                                                                | 367 |
| 7.2   | Sekundäre Mündlichkeit:                                                                 |     |
|       | Der Erzähler im Heldenepos und im höfischen Roman                                       | 369 |
| 7.2.1 | Allgemeines                                                                             | 369 |
| 7.2.2 | Narrative Wissensvergabe und sekundäre Mündlichkeit im Heldenepos: Das ‚Nibelungenlied‘ | 370 |
| 7.2.3 | Narrative Wissensvergabe und sekundäre Mündlichkeit im höfischen Roman                  | 374 |
| 7.2.4 | Mittelalterliches Wiedererzählen                                                        | 378 |
| 7.2.5 | Frau Aventiure als Personifikation des Stoffs                                           | 380 |
| 7.3   | Zwei Fallbeispiele                                                                      | 383 |
| 7.3.1 | Fokalisierung/Point of view/Perspektive in Gottfrieds ‚Tristan‘                         | 383 |
| 7.3.2 | Experimente oder Fehlgriffe? Konrads ‚Partonopier‘                                      | 386 |
|       | Literatur                                                                               | 396 |
|       | Quellen                                                                                 | 396 |
|       | Darstellungen und Hilfsmittel                                                           | 402 |
|       | Autoren- und Textregister                                                               | 429 |
